# Supplementary material for: Ultrafast nonequilibrium dynamics of short-range protein electron transfer in flavodoxin
Source: Royal Society of Chemistry journal article supplement (doi:10.1039/d1cp04445a), 2021-11-18
Supplement: d1cp04445a1.pdf [file d1cp04445a1.pdf]

## **Supplementary Information**

# **Ultrafast Nonequilibrium Dynamics of Short-Range Protein Electron Transfer in Flavodoxin**

Jie Yang, Yifei Zhang, Ting-Fang He, Yangyi Lu, Lijuan Wang, Bei Ding\* and Dongping Zhong\*

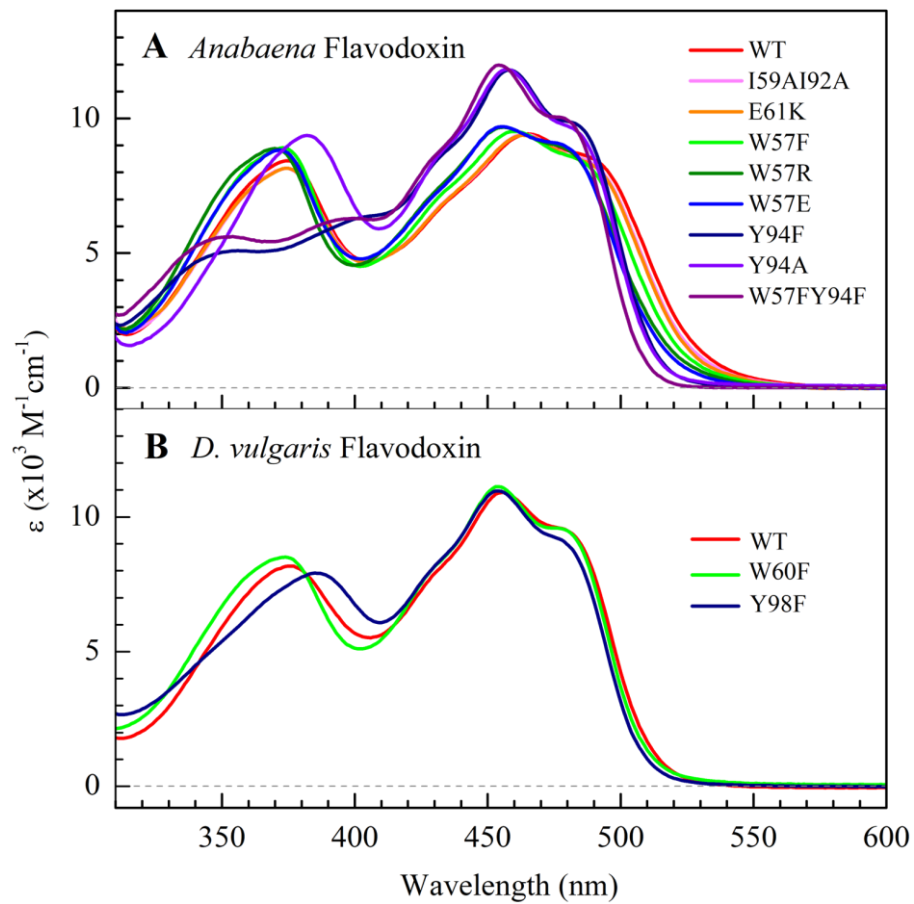

**Figure S1.** (A) Absorption spectra of *Anabaena* flavodoxin and (B) *D. vulgaris* flavodoxin.

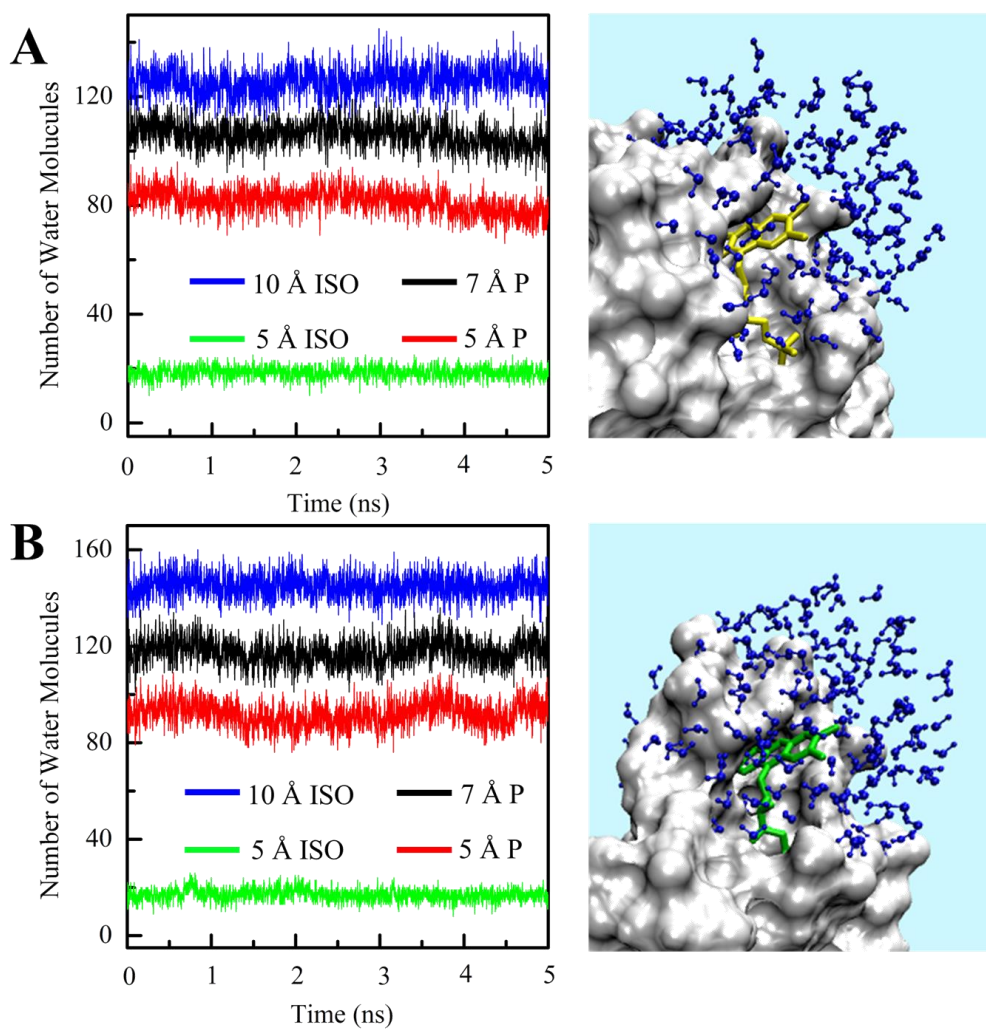

**Figure S2.** Comparison of water molecules from MD simulations and surface map structures of (A) *Anabaena* and (B) *D. vulgaris* flavodoxin.

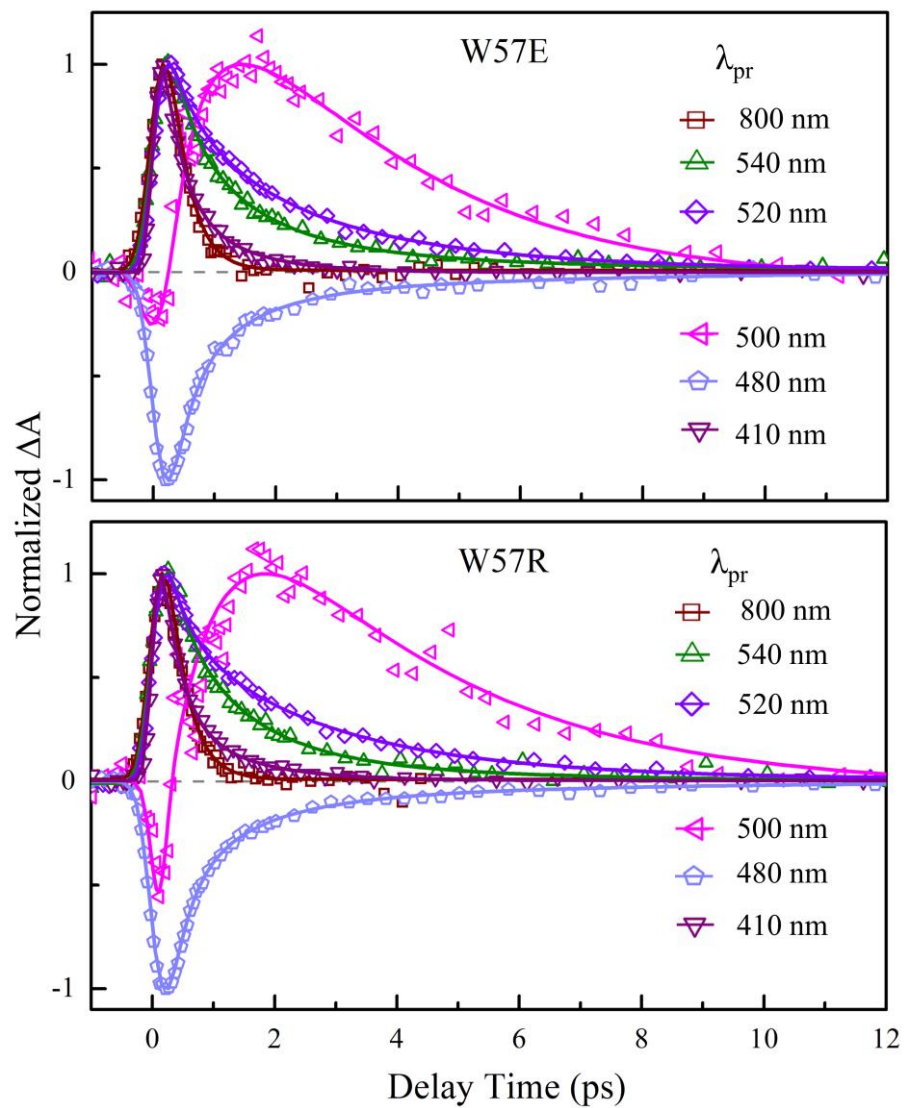

**Figure S3.** Normalized transient absorption of *Anabaena* flavodoxin W57E and W57R probed from 800 to 410 nm for the ET reactions with the donor Y94.

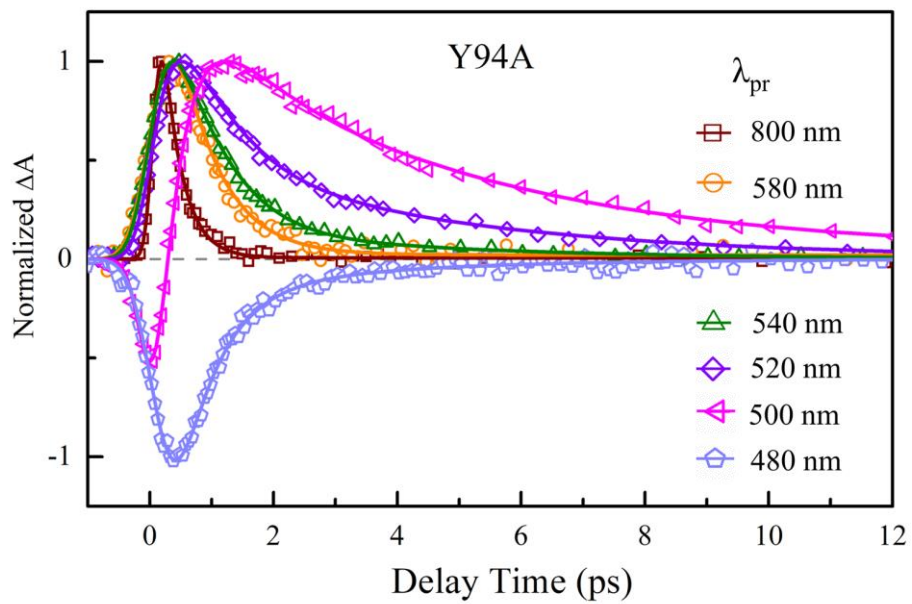

**Figure S4.** Normalized transient absorption of *Anabaena* flavodoxin Y94A probed from 800 to 410 nm for the ET reaction with the donor W57.

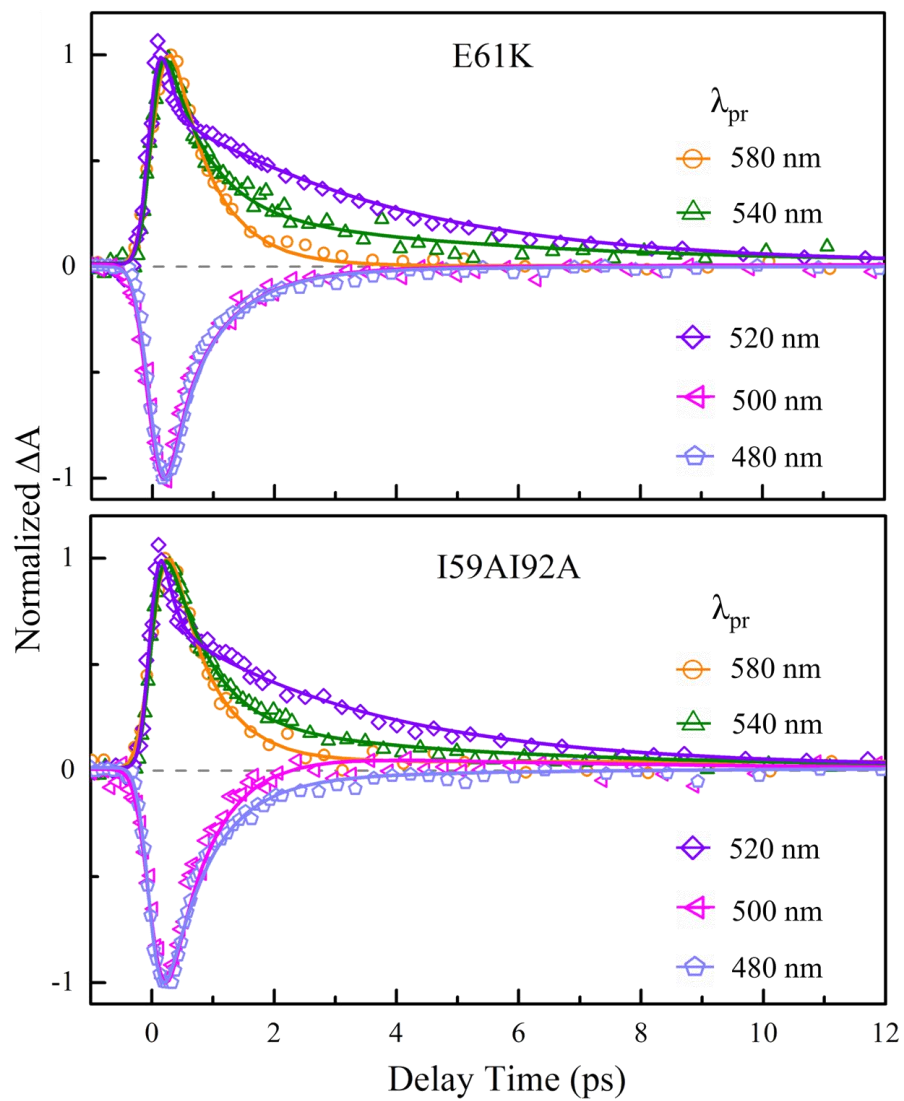

**Figure S5.** Normalized transient absorption of *Anabaena* E61K and I59AI92A probed from 580 to 480 nm for the ET reactions with dual donors Y94 and W57.

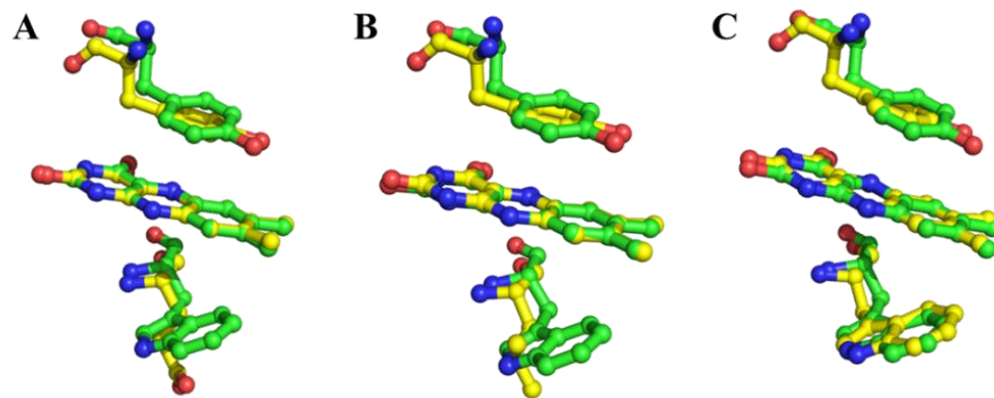

**Figure S6.** Structure alignment of *Anabaena* mutants (yellow) with *D. vulgaris* WT (green, PDB: 2FX2) flavodoxin. From the left to right, A-C represent W57E, W57L and I92A (PDB: 2V5V, 1OBO, 2V5U).

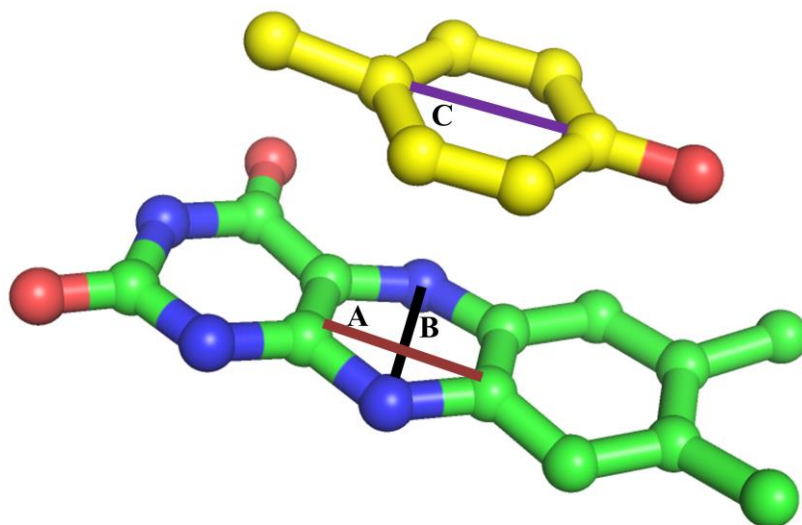

**Figure S7.** The several lines are used to calculate the angles between Tyr and ISO ring which are shown in Table S1.



**Table S1.** Angles between Tyr and ISO ring in two species.

|                    | mutants | angle-AC (°) | angle-BC(°) |
|--------------------|---------|--------------|-------------|
| <i>Anabaena</i>    | WT      | 2.3          | 88.4        |
|                    | W57E    | 5.3          | 85.0        |
|                    | W57L    | 9.6          | 80.3        |
|                    | I92A    | 3.6          | 86.3        |
|                    | K2AK3A  | 6.6          | 96.3        |
| <i>D. vulgaris</i> | WT      | 21.7         | 68.6        |
|                    | G61V    | 10.8         | 79.6        |
|                    | D95E    | 18.3         | 71.3        |
|                    | D95A    | 17.1         | 74.2        |
|                    | S64C    | 18.7         | 72.7        |

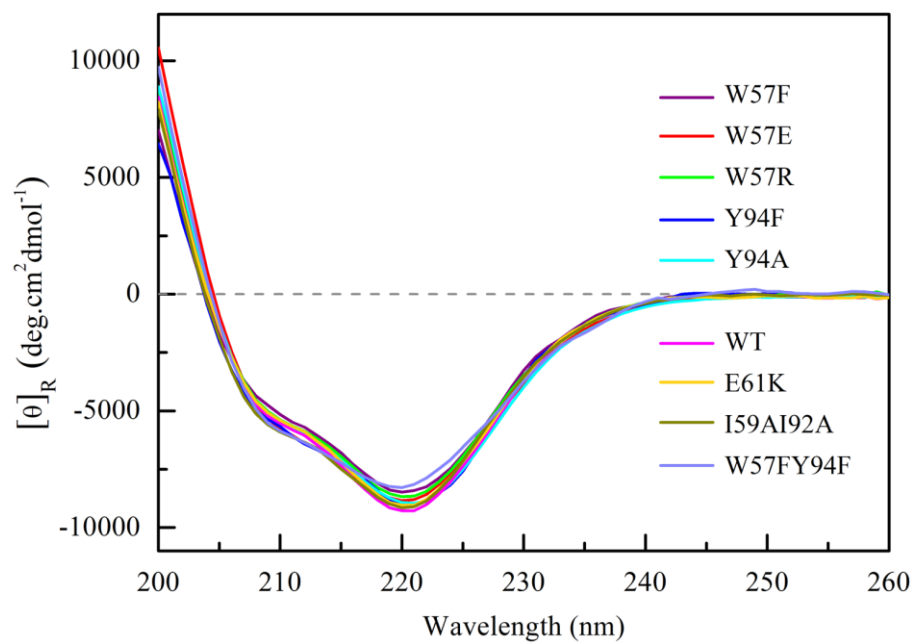

**Figure S8.** CD spectra of WT and mutant *Anabaena* flavodoxins.
